# Supplementary material
Source: Springer Nature journal article supplement (https://www.springermedizin.de/resource/supplementary/12889_2007_1091_MOESM1_ESM.pdf/9502432)
Supplement: MOESM1 [file 9502432]

# Questionnaire for Medical Students

(all data will be treated with confidentiality)

Last Name: \_\_\_\_\_ First Name: \_\_\_\_\_ DOB: \_\_\_\_\_

Address: \_\_\_\_\_ Zip, City: \_\_\_\_\_

Semester: \_\_\_\_\_ Tel.: \_\_\_\_\_

## Previous Work with Danger of Infection (including temporary work, civil service, volunteer social year, etc.)

| Activities / Workplace | from: | to: |
|------------------------|-------|-----|
|                        |       |     |

## Previous Illnesses (especially chronic illnesses and infections, skin diseases, lung diseases, etc.):

Do you currently have health complaints? Yes  No

If yes, which:

| Vaccinations | Number | Date/Year of the last vaccine | Year of having had the disease |
|--------------|--------|-------------------------------|--------------------------------|
| Rubella      |        |                               |                                |
| Measles      |        |                               |                                |
| Mumps        |        |                               |                                |
| Chicken Pox  |        |                               |                                |

Date

Signature
